# Supplementary material for: Principles of voxel refinement in optical direct write lithography
Source: Royal Society of Chemistry journal article supplement (doi:10.1039/c1jm11915j), 2011-01-01
Supplement: c1jm11915j.pdf [file c1jm11915j.pdf]

## Supplementary Information

### Principles of voxel refinement in optical direct write lithography

Timothy F. Scott,<sup>a</sup> Christopher J. Kloxin,<sup>b</sup> Darren Forman,<sup>c</sup> Robert R. McLeod<sup>c</sup> and Christopher N. Bowman<sup>\*a</sup>

<sup>a</sup> *Department of Chemical and Biological Engineering, University of Colorado, Boulder, CO 80309-0424, USA.*

<sup>b</sup> *Department of Materials Science and Engineering, and Department of Chemical Engineering, University of Delaware, Newark, Delaware 19716, USA.*

<sup>c</sup> *Department of Electrical, Computer, and Energy Engineering, University of Colorado, Boulder, Colorado 80309-0425, USA.*

\* *E-mail: christopher.bowman@colorado.edu*

The intensity  $I$  of a Gaussian beam can be written as

$$I = \frac{1}{1 + (z/z_0)^2} \exp \left[ -2 \frac{(r/w_0)^2}{1 + (z/z_0)^2} \right],$$

where  $r$  and  $z$  are the radial and axial coordinates,  $w_0$  is the beam waist and  $z_0$  is the Rayleigh range. These relate to the numerical aperture ( $NA$ ) of the focus by

$$w_0 = \frac{\lambda}{\pi NA}$$

and

$$z_0 = \frac{\lambda n}{\pi NA^2},$$

where  $\lambda$  is the vacuum wavelength and  $n$  is the medium index of refraction. The absorption rate of an  $m$ -photon photoinitiator will be proportional to the intensity raised to a power  $m$ . In the

presence of bimolecular termination, the steady state primary radical concentration is proportional to the absorption rate raised to a power  $\alpha$ . Thus, the primary radical concentration is proportional to  $I^{m\alpha}$ . The full width at half maxima of this expression in the radial (i.e., transverse) and axial (lateral) directions are

$$D_{\text{FWHM}} = 2w_0 \sqrt{\frac{\ln 2}{2m\alpha}}$$

and

$$L_{\text{FWHM}} = 2z_0 \sqrt{2^{1/m\alpha} - 1}$$

which are denoted as equations (1) and (2).
